1                    **Growth charts for individualized evaluation of brain**  
2                    **morphometry for preschool children**

3  
4    Hongxi Zhang <sup>1, #</sup>, Jia Li <sup>2, 3, #</sup>, Xiaoli Su <sup>1</sup>, Yang Hu <sup>2, 4</sup>, Tianmei Liu <sup>1</sup>, Shaoqing Ni  
5    <sup>5</sup>, Haifeng Li <sup>6</sup>, Xi-Nian Zuo <sup>7, 8, 9</sup>, Junfen Fu <sup>10, \*</sup>, Ti-Fei Yuan <sup>4, 11, 12, \*</sup>, Zhi Yang <sup>2, 4,</sup>  
6    <sup>12, \*</sup>

7    <sup>1</sup> Department of Radiology, Children's Hospital, Zhejiang University School of  
8    Medicine, Hangzhou, China

9    <sup>2</sup> Laboratory of Psychological Health and Imaging, Shanghai Mental Health Center,  
10    Shanghai Jiao Tong University School of Medicine, Shanghai, China

11    <sup>3</sup> Department of Statistics and Finance, the School of Management, University of  
12    Science and Technology of China, Hefei, China

13    <sup>4</sup> Shanghai Key laboratory of Psychotic disorders, Shanghai Mental Health Center,  
14    Shanghai Jiao Tong University School of Medicine, Shanghai, China

15    <sup>5</sup> Clinical Trial Institute, Children's Hospital, Zhejiang University School of Medicine,  
16    Hangzhou, China

17    <sup>6</sup> Department of Rehabilitation, Children's Hospital, Zhejiang University School of  
18    Medicine, Hangzhou, China

19    <sup>7</sup> IDG/McGovern Brain Science Institute, Beijing Normal University;

20    <sup>8</sup> Department of Psychology, University of Chinese Academy of Sciences (UCAS),  
21    Beijing, China; CAS Key Laboratory of Behavioral Science, Institute of Psychology,  
22    Beijing, China;

23    <sup>9</sup> Key Laboratory of Brain and Education, Nanning Normal University, Nanning,  
24    China

25    <sup>10</sup> Department of Endocrinology, Children's Hospital, Zhejiang University School of  
26    Medicine, Hangzhou, China

27    <sup>11</sup> Co-innovation Center of Neuroregeneration, Nantong University, Nantong, Jiangsu,  
28    China

**NOTE: This preprint reports new research that has not been certified by peer review and should not be used to guide clinical practice.**

1 <sup>12</sup> Brain Science and Technology Research Center, Shanghai Jiao Tong University,  
2 Shanghai, China.

3

4 # Authors with equal contribution

5 \* Correspondence should be addressed to Dr. Zhi Yang, Shanghai Mental Health

6 Center, Shanghai Jiao Tong University School of Medicine, Shanghai, China, email:

7 [yangz@smhc.org.cn](mailto:yangz@smhc.org.cn); Dr. Ti-Fei Yuan, Shanghai Mental Health Center, Shanghai Jiao

8 Tong University School of Medicine, Shanghai, China, email: [ytf0707@126.com](mailto:ytf0707@126.com); Dr.

9 Junfen Fu, Department of Endocrinology, Children's Hospital, Zhejiang University

10 School of Medicine, Hangzhou, China, email: [fjf68@zju.edu.cn](mailto:fjf68@zju.edu.cn)

11

12 **Short title:** Charting brain morphometry in children

13 Words in Text: 5123; Abstract: 175; Figures: 4; Tables: 2

14

## 1 **Abstract**

2 Brain development from 1 to 6 years-of-age anchors the rapid development of a wide  
3 range of functional capabilities. However, quantitative growth charts of typical  
4 development during this age period are lacking, preventing the identification of early  
5 brain abnormalities. Here we characterize the time-dependent individual differences of  
6 cortical thickness and subcortical volume in 340 typically developing children and  
7 construct regional growth curves for these brain morphological measures. The growth  
8 curves reflect four types of time-dependence for cortical thickness and subcortical  
9 volume metrics. At the individual level, the growth curve model provides percentiles  
10 for each brain region's cortical thickness or volume during ages 1 to 6, allowing for  
11 individualized inferences of brain developmental status relative to the same-age  
12 population. The growth curves further demonstrate clinical utility potentials by  
13 identifying children with developmental speech and language disorders, achieving high  
14 accuracies on data collected on both 1.5T and 3T scanners. Our results fill the  
15 knowledge gap in brain morphometrics in a critical development period and provide  
16 an avenue for individualized brain developmental status evaluation, with demonstrated  
17 sensitivity and generalizability.

18

19 **Keywords:** brain development; brain structure; childhood development;  
20 developmental brain disorder; growth curve; diagnostic imaging

21

## 1 Introduction

2 Brain development comprises complex morphological and volumetric changes [1,2].  
3 Variations in the brain's growth and regional differences emerge consistently during  
4 childhood and adolescence, contributing to inter-individual differences in general  
5 intelligence and functioning [3,4]. Such a life-span dynamic trajectory of both cortical  
6 and subcortical changes has been examined with a structural imaging approach [5,6].  
7 Previous studies reported non-linear decreases in cortex gray matter volume and  
8 increases in white matter during the development period, mainly based on non-  
9 continuous or multiple site samples of children aged over eight or less than two years  
10 old [1,2,7–11]. This notable age gap reflects the challenge of recruiting healthy children  
11 between 1 to 6 years-of-age. Thus, the age-dependent morphometric dynamics of  
12 cortical and subcortical structures remain elucidated within this critical developmental  
13 period [12].

14 Two neuroimaging studies have covered this 1-6 age-span. One study reported cortical  
15 myelination changes reflected by myelin water fraction and T1 relaxation times [13];  
16 the other study indicated that the white matter myelination reflected distinct  
17 neurodevelopmental processes from cortical thickness [14]. However, the annual change  
18 of cortical thickness and volume subcortical regions in this 1-6 age-span has not been  
19 quantified, and there is no model available to evaluate brain maturation.

20 To fill in this gap, we quantified typical year-by-year maturation in cortical thickness  
21 and subcortical volume based on brain imaging data from 340 children between 1 and

1 6 years old. We further developed growth curve models for all cortical and subcortical  
2 regions to characterize their age-dependence and to make inferences for individuals.  
3 We examined whether the models are useful for detecting abnormal brain development  
4 by training and testing classifiers to recognize children with language developmental  
5 disorders. The sensitivity and generalizability of the models were further examined  
6 using data from an independent scanner. The growth curve models reveal unique  
7 information that can help understand individual differences in the brain during this  
8 critical period and provide a novel tool for recognizing atypical structural brain  
9 development.

10

## 11 **Methods**

### 12 *Participants*

13 A total of 391 typical developing children (TDC) and 38 children with developmental  
14 speech/language disorder (DSLD) between one and six years old were recruited in the  
15 Department of Radiology, the Children's Hospital affiliated to Zhejiang University  
16 School of Medicine, Hangzhou, China. The Medical Research Ethics committee at the  
17 Children's Hospital approved the study. The parents of all participants signed the  
18 written informed consent form.

19 The inclusion criteria for TDC were: age between 1 and 6 years old; full-term  
20 (gestational age between 37 and 41 weeks) without any complicated perinatal course;  
21 referral for neuroimaging examination with indications including one episode of

1 idiopathic febrile seizure, dizziness, headaches, facial or arm paralysis, trauma, short-  
2 term fever of unknown reason, and physical examination; typical results of neurological  
3 examination (examined by HL); free of current and past neurological or psychiatric  
4 disorders; and no evidence of genetic, metabolic, or infectious diseases. Exclusion  
5 criteria included: unable to complete the scans, poor image quality, and remarkable  
6 brain MRI radiological interpretation (examined by HX.Z).

7 The DSLD group was composed of patients referred to a neuroimaging examination  
8 with an indication of developmental speech/language disorder. The clinical diagnosis  
9 of DSLD was confirmed by a pediatric neurologist (H.L.), following criteria for  
10 language development delays[15,16]. The inclusion criteria were: age between 1.5 and  
11 6 years old; full-term (gestational age between 37 and 41 weeks) without any  
12 complicated perinatal course; unable to produce a single word before 18 months of age,  
13 or produced less than 30 words after age 24 months, or expressing fewer than 3/5  
14 linguistic structures for boys/girls after 30 months, or unable to express two-word  
15 phrases after 36 months of age; and no evident brain structural abnormality on  
16 conventional MRI. Participants with any of the following were excluded: autism  
17 spectrum disorder, intellectual disability, hearing deficit, phonological production  
18 deficit, or other sensory deficits; tics disorders, coprolalia syndrome, attention-  
19 deficit/hyperactivity disorder, specific learning disability, anxiety disorders, depressive  
20 disorders, or seizures. A senior radiologist (HX.Z) further assessed clinical scans (both  
21 T1 and T2 weighted images) to exclude remarkable brain structure abnormalities and  
22 myelination abnormalities.

1 *MRI acquisition*

2 Twenty-six DSLD participants and 303 TDC were scanned with a Siemens 1.5T MRI  
3 scanner (Magnetom Avanto, Siemens Healthcare, Erlangen, Germany). Besides regular  
4 T1- and T2-weighted clinical scans, high-resolution T1-weighted 3D images were  
5 acquired using a magnetization prepared rapid gradient echo (MPRAGE) sequence  
6 with the following parameters: TR = 1910 ms, TE = 3.06 ms, TI = 1100ms, flip angle  
7 = 15°, FOV = 192 mm × 192 mm, data matrix = 256 × 256, spatial resolution = 0.8  
8 × 0.8 × 1.0 mm<sup>3</sup>. The participants who could not cooperate with examinations due to  
9 their young age were sedated with 10% chloral hydrate (50mg/ml) orally or by enema  
10 before scanning.

11 The other 66 TDC and 13 DSLD participants were scanned with a Philips Achieva 3T  
12 TX MRI scanner (Philips Healthcare, Best, The Netherlands). Besides regular T1- and  
13 T2-weighted clinical scans, high-resolution T1-weighted 3D images were acquired using  
14 a 3D Turbo Field Echo (3D-TFE) sequence with the following parameters: TR = 2000  
15 ms, TE = 3.7 ms, TI = 800ms, flip angle = 8°, FOV = 256 mm × 256 mm, data matrix  
16 = 320 × 320, 180 slices, spatial resolution = 0.8 × 0.8 × 2.0 mm<sup>3</sup>.

17 *Image processing*

18 The clinical scans were first interpreted to exclude participants who exhibited  
19 remarkable brain structural abnormality. The T1-weighted 3D images of the remained  
20 participants were visually checked for head motion artifacts. Images with obvious  
21 artifacts were further dropped from further analyses.

1 A total of 292 TDC completed MRI scans on the 1.5T scanner, among which 11 were  
2 excluded due to remarkable brain abnormalities, and 16 were excluded due to poor  
3 image quality based on visual inspections 265 were included in further analyses. The  
4 sample sizes from age 1 to age 6 were: 52 (22 females), 49 (20 females), 47 (19 females),  
5 34 (15 females), 43 (18 females), and 40 (24 females), respectively. Supplementary  
6 Table 1 presents a summary of the indications when referred for neuroimaging  
7 examination for the 265 TDC. The most common indications were idiopathic febrile  
8 seizure, headache, and physical examination. These three types of indications  
9 accounted for 80.4% of the sample.

10 A total of 26 developmental speech and language disorder (DSLD) patients, who  
11 received "no obvious abnormal" radiology diagnoses, completed brain scans on the  
12 1.5T MRI scanner, among which six were excluded due to low image quality, remaining  
13 20 DSLD for further analyses. There were six females and 14 males. The mean age was  
14 3.03, with a standard deviation of 1.29 years. To form a control group for the 20 DSLD  
15 patients, we selected 20 people from the 265 TDC matched with the DSLD patients  
16 one-on-one by sex and age. The mean age of this control group was 2.97, with a  
17 standard deviation of 1.37 years.

18 Sixty-six TDC and 13 DSLD participants completed MRI scans on the 3T scanner,  
19 but 11 TDC and 3 DSLD participants were excluded due to poor image quality or  
20 remarkable brain abnormalities, remaining 55 TDC and 10 DSLD for further analyses.  
21 The sample sizes of TDC from age 1 to age 6 were: 16 (9 females), 11 (7 females), 10  
22 (7 females), 3 (2 females), 5 (2 females), and 10 (7 females). Supplementary Table 2



1 presents a summary of the indications in the referral for neuroimaging examination for  
2 the 55 TDC included in the analyses. The most common indications were idiopathic  
3 febrile seizure, headache, and physical examination, which accounted for 87.3% of the  
4 sample.

5 Supplementary Figure 1 presents a flowchart of the following imaging analysis steps.  
6 Brain extraction results from CAT12, volbrain [17], ANTs [18], and FreeSurfer [19]  
7 were compared. Based on a visual check of all images, the brain masks generated by  
8 the volbrain were chosen as the brain extraction masks. Next, the TDC-1.5T group  
9 was split into a training set containing 245 participants and a test set of 20 participants  
10 that best matched the age and sex of the 20 DSLD participants.

11 We divided the TDC in the training dataset into six non-overlapping age groups (i.e.,  
12 1-2, 2-3, 3-4, 4-5, 5-6, and 6-7 years old). A brain image template was constructed for  
13 each group using ten male and ten female participants who were randomly selected,  
14 following ANTs' multivariate template construction procedure [20]. This procedure has  
15 been used in previous studies to generate population-specific brain templates [21,22].  
16 Then the multivariate joint label fusion procedure in ANTs [23], combined with a set  
17 of 15 manually labeled brains, was applied to each age-specific template image to  
18 generate six image segmentation prior probability images, representing gray matter,  
19 white matter, cerebrospinal fluid (CSF), subcortical structures, brain stem, and  
20 cerebellum, respectively. Supplementary Figure 2 presents the resultant age-specific  
21 brain templates and corresponding prior probability images.

22 With these age-specific prior brain tissue probability images and brain templates, the

1 n-tissue segmentation tool in ANTs was applied to obtain white matter masks for all  
2 participants. The white matter segmentation quality for all participants was visually  
3 checked, and all images yielded acceptable white matter masks. The cortical thickness  
4 and subcortical volume statistics for each participant were estimated using FreeSurfer.  
5 Specifically, the denoised brain structure images from ANTs' N4 denoising step were  
6 input to the FreeSurfer "recon-all" pipeline. The corresponding white matter and brain  
7 extraction masks obtained previously were injected into the pipeline to improve its  
8 performance in constructing surface models for this very young sample. The FreeSurfer  
9 "recon-all" pipeline parcellated the cerebral cortex into 62 (31 per hemisphere)  
10 anatomical regions defined by the Desikan-Killiany Atlas and parcellated subcortical  
11 structures into 20 regions (excluding ventricles and brain stem) per the default 'aseg'  
12 atlas in FreeSurfer. The "recon-all" pipeline calculated regional mean cortical thickness,  
13 subcortical region volume, and volume of a variety of brain tissues such as cerebral  
14 white matter, subcortical gray matter, cerebellar white matter, cerebellar cortex. These  
15 metrics were used in further analyses.

### 16 *Age-group comparisons*

17 In the training dataset ( $n = 245$ ), we first applied a linear model to each of the above  
18 brain morphometrics to examine the effects of age, sex, and their interactions. To avoid  
19 the potential impact of outliers, we cleaned the data by setting the values outside the  
20  $[Q_{0.25} - 1.5 \text{ IQR}, Q_{0.75} + 1.5 \text{ IQR}]$  range to the closest boundaries of this range, where  
21  $Q_{0.25}$  and  $Q_{0.75}$  are the first and third quartiles, and IQR indicates the distance between  
22  $Q_{0.25}$  and  $Q_{0.75}$ . We then characterized the age-dependence of the metrics by 1)

1 calculating the change rate for each group from age 2 to age 6, relative to age 1, and  
2 2) examining year-by-year changes using independent sample t-tests. The significance  
3 was corrected for multiple comparisons using the false-discovery rate (FDR) approach.

#### 4 *Growth curve model*

5 We constructed a growth curve model for each of the metrics to model the age-  
6 dependence of both typical value and individual variability of the brain morphometrics.  
7 Furthermore, the models can evaluate relative positions of a given individual among  
8 the same-age population, analogous to the developmental score for height or weight of  
9 a child. The model construction procedures were largely consistent with those used for  
10 constructing height/weight growth curves by the World Health Organization [24].  
11 Technical details, as well as differences from the WHO procedures, are described below.  
12 The following procedure was applied to each metric. For those exhibiting significant  
13 sex differences, additional sex-specific growth curve models were constructed.

14 *GAMLSS model.* The Generalized Additive Model for Location, Scale, and Shape  
15 (GAMLSS) was adopted to fit the growth curves. This model is a distributional  
16 regression approach, allowing for modeling age-dependent changes for all probability  
17 distribution parameters. Mathematically, the model can be expressed as:

$$\begin{aligned} \mathbf{Y} &\overset{\text{ind}}{\sim} \mathcal{D}(\boldsymbol{\mu}, \boldsymbol{\sigma}, \boldsymbol{\nu}, \boldsymbol{\tau}) \\ \eta_1 &= g_1(\boldsymbol{\mu}) = \mathbf{X}_1\boldsymbol{\beta}_1 + s_{11}(\mathbf{x}_{11}) + \dots + s_{1J_1}(\mathbf{x}_{1J_1}) \\ \eta_2 &= g_2(\boldsymbol{\sigma}) = \mathbf{X}_2\boldsymbol{\beta}_2 + s_{21}(\mathbf{x}_{21}) + \dots + s_{2J_2}(\mathbf{x}_{2J_2}) \\ \eta_3 &= g_3(\boldsymbol{\nu}) = \mathbf{X}_3\boldsymbol{\beta}_3 + s_{31}(\mathbf{x}_{31}) + \dots + s_{3J_3}(\mathbf{x}_{3J_3}) \\ 18 \quad \eta_4 &= g_4(\boldsymbol{\tau}) = \mathbf{X}_4\boldsymbol{\beta}_4 + s_{41}(\mathbf{x}_{41}) + \dots + s_{4J_4}(\mathbf{x}_{4J_4}) \end{aligned}$$

19 In this formulation,  $\mathbf{X}_i$  and  $\mathbf{x}_{ij}$  are subsets of the exploratory variable, i.e., TDC

1 participants' precise age.  $Y$  is the response variable, i.e., the value of a given regional  
2 metric.  $D$  is a probability distribution, and  $\mu$ ,  $\sigma$ ,  $\nu$ , and  $\tau$  are possible parameters. The  
3 number and meaning of these parameters vary with the specific form of the distribution  
4  $D$  determined in the model fitting step.  $g_1$  to  $g_4$  are link functions to map the  
5 parameters onto the entire real axis, and  $s_{ij}$  are nonparametric smoothing functions of  
6 explanatory variables.  $X_i\beta_i$  and  $s_{ij}(x_{ij})$  are additive terms. Model fitting was  
7 implemented using the R package "GAMLSS".

8 Choice of distribution. To choose a proper distribution ( $D$ ) for the current dataset,  
9 four distributions were examined, including Box-Cox power exponential, Box-Cox t,  
10 Box-Cox normal, and Johnson's SU. The training samples were divided into six non-  
11 overlapping age groups (1-2, 2-3, 3-4, 4-5, 5-6, and 6-7 years old), and model fitting  
12 was conducted within each age group without considering additive terms. Per the  
13 Akaike Information Criterion (AIC), the Box-Cox normal distribution exhibited the  
14 best goodness of fit for over 60% of all six age groups' metrics. We, therefore, adopted  
15 this distribution for model fitting.

16 Choice of additive terms. Two types of additive terms were compared: second-order  
17 polynomial and second-order fractional polynomial. The polynomial term can be  
18 expressed as:  $\beta_0 + \beta_1x^2 + \beta_2x$ , and the fractional polynomial term can be expressed as:  
19  $\beta_0 + \beta_1x^{p_1} + \beta_2x^{p_2}$ ,  $p_i \in -2, -1, -0.5, 0, 0.5, 1, 2, 3$ . The AIC was compared when using these terms  
20 to fit the three parameters of Box-Cox normal distribution with three parameters,  $\mu$ ,  
21  $\sigma$ , and  $\nu$ , representing mean, standard deviation, and skewness. The second-order

1 polynomial term yielded smaller AIC for all regional metrics, and thus this additive  
2 term was adopted in the GAMLSS model.

3 *Model fitting.* The following model fitting procedure was applied:

- 4 1) Construct model 1 to fit only  $\mu$  (see the GAMLSS formula above).
- 5 2) Conduct Q-test on  $\sigma$ ,  $\nu$  in model 1. Q-test examines the normality of the residuals  
6 within a range of an independent variable and has been used to construct WHO Child  
7 Growth Standards to detect parameter misfit. If any parameter's Q-test p-value is less  
8 than 0.05, model 2 will be constructed to fit  $\mu$  and  $\sigma$ .
- 9 3) Conduct Q-test on  $\nu$  in model 2 if it is constructed. If  $\nu$ 's Q-test p-value is less than  
10 0.05, model 3 will be constructed to fit  $\mu$ ,  $\sigma$ , and  $\nu$ .
- 11 4) Compute generalized AIC (GAIC) for the available models.  $GAIC = -2L + km$ , where  
12  $L$  is the likelihood,  $m$  is the number of parameters, and  $k$  was set to 5, given the  
13 relatively limited sample size. The model with the smallest GAIC was chosen as the  
14 final model.

### 15 *Clustering analyses*

16 We conducted hierarchical clustering analyses to reveal the representative development  
17 patterns of the cerebral regions' thickness and the volume of the subcortical regions.  
18 Since 81 unique values of precise age uniformly distributed between 1 to 7, we extracted  
19 the fitted median values for the 81 precise ages and transformed them into  $Z$  scores.  
20 Euclidean distance between the regions was then computed based on the 81-  
21 dimensional vectors. The hybrid hierarchical clustering algorithm, implemented in the

1 R package "hybridHclust" [25], was then applied to this distance matrix. Briefly, this  
2 method includes three steps:

3 1) Use bottom-up clustering to find the mutual clusters, each of which is a group of  
4 sufficiently close points to each other and distant from all other points.

5 2) Perform a constrained top-down clustering that retains the mutual clusters.

6 3) Perform a top-down clustering within each mutual cluster.

7 We chose the numbers of clusters based on the "knee points" on the inter-cluster  
8 distance vs. the number of clusters plots to visualize the representative developmental  
9 patterns. This procedure was performed for the cortical thickness, and subcortical  
10 volume results separately. The dendrograms were cut into clusters according to the  
11 chosen number of clusters. The within-cluster growth curves were normalized to  
12 relative changes against age 1 and averaged to represent the clusters' typical patterns.

### 13 *Recognizing DSLD using brain morphometrics*

14 To evaluate the utility of the growth curve models, we examined whether TDC and  
15 DSLD participants could be accurately classified using the development scores (i.e.,  
16 the percentiles among the same-age population) derived from the growth curve models.

17 For those metrics showing significant age-differences, the development scores were  
18 derived from the corresponding sex-specific growth curves. Four classifiers, based on  
19 regularized discriminant analysis (RDA), as implemented in the R package "klaR" [26],  
20 were trained to recognize DSLD from TDC participants. The four classifiers included  
21 the regional cortical thickness, subcortical volume, volume of brain tissues, and all

1 metrics as features, respectively. The performance of the classifiers was evaluated using  
2 leave-one-out cross-validation. Classification accuracy and the area under the receiver  
3 operator curves (AUC) were calculated to indicate the classifiers' performance.  
4 To further examine the sensitivity and generalizability of the growth curve models,  
5 we applied the growth curve models constructed using the data from the 1.5T  
6 scanner (n =245) to the images from the 3T scanner to derive a percentile value  
7 among the same-age population for each region in each participant. These data were  
8 then inputted to the classifiers trained using the 20 TDC and 20 DSLD participants  
9 scanned on the 1.5T scanner. This procedure formed an independent test of the  
10 performance of the classifier. We calculated the AUC of the classifiers to indicate  
11 their performance.

## 12 *Data availability*

13 We shared the brain templates for children from 1 to 6 years old (3D nifty files), the  
14 growth curve models of all brain regions, and the code to perform the analysis in a  
15 public open-science repository:

16 ([https://osf.io/fm7cq/?view\\_only=9716e89f09e04b4bb2b4f0323ab2b684](https://osf.io/fm7cq/?view_only=9716e89f09e04b4bb2b4f0323ab2b684)). The  
17 original and processed imaging data are available on reasonable request.

18

## 19 **Results**

20 *Age-difference of brain morphometrics*

1 Brain tissue volumes. Using a linear model, we examined the main effects of sex and  
2 age and their interactions on the volume of a series of brain tissues, including brain  
3 volume (excluding ventricles), total gray matter volume, total cortex volume, total  
4 cerebral white matter volume, subcortical gray matter volume, cerebellar white matter  
5 volume, and cerebellar cortex volume. There was no metric showing significant sex by  
6 age interaction effects. After false-discovery rate (FDR) correction ( $q < 0.05$ ), the brain  
7 volume, total cortex volumes, total cerebral white matter volumes, and total gray  
8 matter volume exhibited significant differences between male and female participants.  
9 Table 1 displays the age-group differences and the change rate of the volume of brain  
10 tissues. According to these results, ages 2-3 exhibited the most significant increase in  
11 all types of brain tissues. Age 4 also showed a significant volume increase in cerebral  
12 white matter, cortex, total gray matter, and whole-brain (excluding ventricles).  
13 Supplementary Table 3 presents age-group differences and change rates for male and  
14 female children separately for those brain tissues showing significant sex-difference.  
15 The observations in the pooled samples remained, while after multiple-comparisons  
16 correction, only male children exhibited a significant increase in the volume of the  
17 brain (excluding ventricles), total gray matter, total cortex, and total cerebral white  
18 matter at age 4.

19 Cortical thickness. There was no region showing a significant interaction effect between  
20 age and sex or the main effect of sex on cortical thickness (after FDR correction).  
21 Figure 1 shows maps of cortical thickness across 1-6. For most cortical regions, the  
22 cortical thickness was between 2 and 4 mm and showed changes across ages. To



1 quantify the age-dependence of cortical thickness, we examined the age-group  
2 difference of mean thickness of every cortical region. Figure 2A shows maps of mean  
3 annual change rates across 2-6 years old, relative to the first year. For most regions,  
4 the cortical thickness exhibited a monotonous downward trend. At age 6, the cortical  
5 thickness of the bilateral orbitofrontal cortex, bilateral cuneus, and bilateral  
6 pericalcarine gyrus was thinner than 90% of age 1. For the precentral gyrus, entorhinal  
7 cortex, and parahippocampal gyrus, the cortical thickness first increases and decreases  
8 in age 4 and age 5. Still, the cortex in these regions was not thinner than the first year  
9 for all age groups. The cortical thickness changes reflected symmetry between the two  
10 hemispheres, i.e., the corresponding regions between hemispheres showed similar  
11 changing trends. Figure 2C shows t maps of the year-by-year difference of all cortical  
12 regions. The white dots mark a significant year-by-year difference (multiple-  
13 comparisons corrected using FDR,  $q < 0.05$ ). These results showed that most cortical  
14 regions' significant changes appeared in age 2, age 3, and age 6.

15 Subcortical volume. There was no significant interaction effect between age and sex on  
16 subcortical regions' volume after FDR correction. The volume of bilateral thalamus  
17 exhibited significant sex difference after FDR correction: left thalamus: ( $F = 15.03$ ,  $p$   
18  $= 0.00014$ ), right thalamus ( $F=8.47$ ,  $p = 0.004$ ). Table 2 presents the mean and  
19 standard deviation of the volume of subcortical regions for each age group.

20 We examined the age-group difference in the volume of all subcortical regions. Figure  
21 2B shows maps of mean annual change rates across 2-6, relative to the first year. The  
22 volume of subcortical regions increased with age. At age 6, the volume of putamen,

1 palladium, amygdala, accumbens area, and cerebellum white matter was over 30%  
2 larger than age 1. The age-dependent volume change of subcortical regions was also  
3 symmetric. Figure 2D presents year-by-year changes (t-values) for all subcortical  
4 regions. According to these analyses, most subcortical regions' volume significantly  
5 enlarged in age 2 and age 3. At age 4 and age 5, the volume of bilateral putamen,  
6 bilateral pallidum, and left amygdala further increased.

### 7 *Growth curve models and developmental patterns of brain morphometrics*

8 We further modeled the age-dependent individual variability of brain morphometrics  
9 using the growth-curve model. Figure 3A presents examples of growth curve models  
10 for cortical thickness, subcortical volume, and brain tissue volume. The 5th, 10th, 25th,  
11 50th, 75th, 90th, and 95th percentage curves were used to visualize the age-dependent  
12 distributions of individual variability. For a given chronological age and a  
13 morphometric feature, the growth curve model could derive a percentage value that  
14 indicates the relative position among the TDC distribution. Supplementary Figures 2-  
15 4 present growth curve models for the mean thickness of all cortical regions, the volume  
16 of all subcortical regions, and the volume of different types of brain tissues.

17 To further characterize the developmental patterns of regional brain morphometrics,  
18 we clustered the growth curves into different types based on their changing trends with  
19 age. Figure 3B maps four types of cortical regions carrying different age-dependence  
20 trends. Figure 3C further depicts a hierarchical dendrogram of similarity of growth  
21 curves among all cortical regions. According to the knee plot of inter-cluster distance  
22 (Figure 3D), we chose to cut the dendrogram to form 4 clusters. Figure 3E shows the

1 age-dependent change rates of the median of the growth curves corresponding to the  
2 four clusters. The first two types of cortical regions exhibited monotonous decreasing  
3 trends with increasing age, and the difference between the two was the slope. The third  
4 type showed a nearly flat growth curve, and the last type demonstrated an inverted-  
5 U shape of the growth curve.

6 For the subcortical regions, we also clustered their volumes' growth curves into four  
7 types (Figure 3F-G) according to the knee plot of inter-cluster distance (Figure 3H).  
8 Figure 3I shows the corresponding growth curves of the four types. The first type of  
9 subcortical regions, including the left amygdala, right putamen, bilateral cerebellum  
10 white matter, and bilateral pallidum, exhibited a steep increasing slope with age. The  
11 second type, including bilateral ventral DC, right amygdala, bilateral hippocampus,  
12 and left putamen, showed a power function-like trend that approximates to 1.2 (change  
13 rate relative to age 1). The last two types exhibited inverted-U shapes of the growth  
14 curve, while the trend was more apparent in the bilateral accumbens area (type 4).  
15 These results revealed the diversity of the age-dependent changes of cortical and  
16 subcortical regions from 1 to 6 years old.

### 17 *Recognizing abnormal development based on brain morphometrics*

18 For a given brain region of an individual, the growth curve model can provide an  
19 individualized inference by deriving a relative position, as reflected by a percentage  
20 value, among the fitted distributions of age-dependent individual variability. We  
21 examined the utility of this feature to recognize children with delayed language and  
22 speech disorders (DLSD). The brain morphometrics of 20 DLSD and 20 age-matched

1 TDC (not included in the samples used to build the growth curve models) were input  
2 to the growth curve models to obtain the corresponding percentage values, which were  
3 used to train a linear discrimination classifier. In Figures 4A, we present an exemplar  
4 growth curve representing the right lateral occipital gyrus's cortical thickness. The  
5 TDC and DSLD participants are marked using black and red circles in the plots. While  
6 most TDC fell within the 5-95% range, a large portion of DSLD participants was  
7 outside this range.

8 To summarize the associations between DSLD and abnormal morphometrics detected  
9 in the regional growth curves, we present a relative risk map in Figure 4B. The value  
10 is a risk ratio of DSLD when a given region is abnormal (outside 5-95% range of the  
11 corresponding growth curve) versus when the region is normal. The thickness of the  
12 bilateral lateral occipital cortex, the right angular gyrus, the bilateral parahippocampal  
13 gyrus, the bilateral cingulate gyrus, and the right frontal cortex exhibited a high risk  
14 ratio. Most subcortical regions, especially the caudate, hippocampus, and amygdala,  
15 showed an increased DSLD risk ratio. These observations reveal that wide-spread brain  
16 regions are related to DSLD, supporting strong associations between DSLD and  
17 abnormal brain development as reflected in the growth curves.

18 To further combine the information from different regions to achieve accurate  
19 recognition of DSLD, we trained linear discrimination classifiers based on the percentile  
20 values derived from the growth curve models. With a 10-fold cross-validation scheme,  
21 the analyses achieved a classification accuracy of 0.975 in classifying DLSD and TDC  
22 participants using all regional cortical thickness, subcortical volume, and brain tissue

1 volume features. The classification accuracy was 0.900 when using the cortical  
2 thickness measures, which was 0.875 when using the subcortical volume measures,  
3 which was 0.900 when using the brain tissue volume features. The performance of the  
4 classifiers was summarized using ROC plots in Figure 4C. The area under curve (AUC)  
5 metrics for the ROC analyses were 0.998, 0.905, 0.928, and 0.950 for all morphometrics,  
6 cortical thickness only, the subcortical volume only, and brain tissue volume only.  
7 These observations reflect that the growth curves help to derive individualized  
8 evaluation of brain development status with clinical potentials.

#### 9 *Independent examination of sensitivity and generalizability of the model*

10 We further examined the sensitivity and generalizability of the DSLD recognition  
11 model with data from an independent 3T scanner. From the growth curve models  
12 constructed using the data from the 1.5T scanner, we derived regional percentile values  
13 of 55 TDC and 10 DSLD patients scanned on the 3T scanner. We then applied the  
14 pre-trained linear discrimination classifiers to recognize DSLD patients based on the  
15 percentile values. As shown in Figure 4D, the classifiers achieved high performance as  
16 reflected by the AUC of ROC curves. When combining all regions' percentile values,  
17 the classifier achieved an AUC of 0.978; when only using cortical thickness, subcortical  
18 volume, brain tissue volume, the AUCs of the classifiers were between 0.913 and 0.920.  
19 These results from an independent scanner with different magnetic strength support  
20 that the growth curve models and the DSLD classifiers based on the percentile values  
21 can provide individualized inferences sensitive to DSLD and generalizable across the  
22 scanner.

## 1 Discussion

2 For the first time, the present study quantified annual changes of cortical thickness  
3 and subcortical volume of typically developing children between 1 and 6 years old. The  
4 thickness in most cortical regions decreased at age 2, age 3, and age 6. Simultaneously,  
5 the volume for the precentral gyrus, entorhinal cortex, and parahippocampal gyrus  
6 showed a different, inverted-U shape of dynamics. The volume of most subcortical  
7 regions significantly enlarged in age 2 and age 3, and the volume of putamen, pallidum,  
8 hippocampus, and amygdala kept increasing at age 4 and age 5. With the growth curve  
9 models for the age-dependence of individual variability, we were able to discriminate  
10 four age-dependent patterns among cortical regions and subcortical regions, providing  
11 a summary of brain morphometrics' developmental patterns.

12 The regional growth curve models enabled identifying DSLD patients with high  
13 sensitivity and specificity. Our independent test further supported the generalizability  
14 of the growth curve models and the classifiers based on them. To our knowledge, these  
15 are the first brain regional growth charts for children ages 1 to 6 years, a critical time  
16 window for diagnosing many developmental disorders. The accuracy of our model,  
17 when all features were combined, reached 0.975 for recognizing DSLD. Since the human  
18 brain reaches 95% of adult size by age 6 [6], our current study addresses a period  
19 during which brain size develops dynamically and substantially and provides a link to  
20 existing studies of structural brain maturation beyond six years-of-age [27]. The growth  
21 curve model generated in the present study offers a potentially valuable tool to measure

1 and define the developmental trajectory of individual brains and to provide clinically  
2 relevant information.

3 Previous studies revealed the potential importance of brain maturation curves in the  
4 diagnosis of early neurodevelopmental disorders [5,28]. For instance, early-onset  
5 schizophrenia patients were found to exhibit abnormal acceleration of gray matter loss  
6 during development [4,29]; autistic children showed distinct patterns of cortex growth  
7 and white-gray matter contrast [30,31], abnormal amygdala volume dynamics [32], and  
8 extreme male-like patterns of interhemispheric connectivity [33]; children with ADHD  
9 have been found to have reduced subcortical volume [34], delayed cortical maturation  
10 [35], and altered hemisphere asymmetry[36]; fragile X syndrome is associated with  
11 aberrant prefrontal cortex maturation[37], and volumetric abnormalities in subcortical  
12 regions [38]. Notably, most studies were based on adolescents imaged after disorders  
13 were diagnosed. Few papers have reported brain imaging samples during childhood  
14 [14,39]; future longitudinal studies are essential to improve the first diagnosis and  
15 initiate earlier treatments for developmental disorders.

16 Besides characterizing the age-dependence and variabilities of typical brain  
17 morphometry development between 1 and 6 years of age, our study represents an initial  
18 effort towards establishing growth charts of brain morphometry in children. The WHO  
19 published growth curve standards for body height and weight for children in 2006 [24],  
20 and the growth chart model has been used in clinical practice for many years, but  
21 there are no childhood growth charts for the typically developing brain. The models  
22 presented in this study represent an initial effort to construct brain growth charts for

1 children, which would enhance the precise diagnosis of developmental brain disease  
2 and might even contribute to individualized education in the future. Although the  
3 sample size in this study is insufficient to construct a clinically useful growth chart,  
4 the present results serve as a starting point. The precision of the preliminary growth  
5 chart model can be improved by incorporating additional samples. For instance, based  
6 on the current models, one could implement a web-based service to evaluate brain  
7 abnormalities of images uploaded by users, providing a percentile among the same age  
8 population for every brain region. This web-based service would learn from the new  
9 data contributed and improve its precision.

10 One limitation of the present study is that the growth curve models were not validated  
11 using independent scanners. Future efforts will involve developing a common algorithm  
12 for different clinical scanners and fitting brain growth curve models to other  
13 racial/ethnic samples. The estimation procedure should consider scanner type and  
14 scanning parameters to provide clinically useful information across different centers. It  
15 would also be preferable to develop an automatic detection algorithm for other  
16 neurological or psychiatric disorders during development, which would require  
17 longitudinal data collection with larger sample size, including sufficient subgroups of  
18 different types of patients.

19 In summary, this study described easy-to-use structural MRI-based brain regional  
20 growth charts, with the potential to predict brain developmental stage and clinical  
21 aberrance.

22



## 1 **Acknowledgements**

2 The authors acknowledge Dr. Xiaolu Ruan and Ms. Jingjing Liu for their help in  
3 cleaning up the data.

4

## 5 **Funds**

6 This work was supported by the National Key Research and Development Program  
7 of China (2018YFC2001600, 2016YFC1305301, 2016YFC1306205); National Natural  
8 Science Foundation of China (81971682, 81571756, 81270023, 81570759, 81270938,  
9 81573516); Natural Science Foundation of Shanghai (20ZR1472800); Shanghai  
10 Municipal Commission of Education-Gaofeng Clinical Medicine Grant Support  
11 (20171929); Hundred-Talent Fund from Shanghai Municipal Commission of Health  
12 (2018BR17); Scientific Research Fund of Zhejiang Provincial Education Department  
13 (Y201431325) ; Shanghai Mental Health Center Clinical Research Center  
14 (CRC2018DSJ01-5; CRC2019ZD04); Research Funds from Shanghai Mental Health  
15 Center (13dz2260500, 2018-YJ-02).

## 16 **Competing interests**

17 There is no competing interests for all authors.

18

19

20

## 1   **References**

- 2   [1]   Giedd JN, Blumenthal J, Jeffries NO, Castellanos FX, Liu H, Zijdenbos A, et  
3       al. Brain development during childhood and adolescence: a longitudinal MRI  
4       study. *Nat Neurosci* 1999;2:861–3. <https://doi.org/10.1038/13158>.
- 5   [2]   Sowell ER. Longitudinal Mapping of Cortical Thickness and Brain Growth in  
6       Normal Children. *J Neurosci* 2004;24:8223–31.  
7       <https://doi.org/10.1523/JNEUROSCI.1798-04.2004>.
- 8   [3]   Shaw P, Greenstein D, Lerch J, Clasen L, Lenroot R, Gogtay N, et al.  
9       Intellectual ability and cortical development in children and adolescents.  
10      *Nature* 2006;440:676–9. <https://doi.org/10.1038/nature04513>.
- 11 [4]   Gogtay N, Giedd JN, Lusk L, Hayashi KM, Greenstein D, Vaituzis AC, et al.  
12      Dynamic mapping of human cortical development during childhood through  
13      early adulthood. *Proc Natl Acad Sci* 2004;101:8174–9.  
14      <https://doi.org/10.1073/pnas.0402680101>.
- 15 [5]   Dennis EL, Thompson PM. Typical and atypical brain development: a review  
16      of neuroimaging studies. *Dialogues Clin Neurosci* 2013;15:359–84.
- 17 [6]   Lenroot RK, Giedd JN. Brain development in children and adolescents:  
18      Insights from anatomical magnetic resonance imaging. *Neurosci Biobehav Rev*  
19      2006;30:718–29. <https://doi.org/10.1016/j.neubiorev.2006.06.001>.

- 1 [7] Chugani HT, Phelps ME, Mazziotta JC. Positron emission tomography study  
2 of human brain functional development. *Ann Neurol* 1987;22:487–97.  
3 <https://doi.org/10.1002/ana.410220408>.
- 4 [8] Sanchez CE, Richards JE, Almlí CR. Age-specific MRI templates for pediatric  
5 neuroimaging. *Dev Neuropsychol* 2012;37:379–99.  
6 <https://doi.org/10.1080/87565641.2012.688900>.
- 7 [9] Sanchez CE, Richards JE, Almlí CR. Neurodevelopmental MRI brain  
8 templates for children from 2 weeks to 4 years of age. *Dev Psychobiol*  
9 2012;54:77–91. <https://doi.org/10.1002/dev.20579>.
- 10 [10] O’Donnell S, Noseworthy MD, Levine B, Dennis M. Cortical thickness of the  
11 frontopolar area in typically developing children and adolescents. *Neuroimage*  
12 2005;24:948–54. <https://doi.org/10.1016/j.neuroimage.2004.10.014>.
- 13 [11] Li G, Nie J, Wang LL, Shi F, Lin W, Gilmore JH, et al. Mapping region-  
14 specific longitudinal cortical surface expansion from birth to 2 years of age.  
15 *Cereb Cortex* 2013;23:2724–33. <https://doi.org/10.1093/cercor/bhs265>.
- 16 [12] Richards JE, Xie W. Brains for All the Ages. *Adv. Child Dev. Behav.*, vol. 48,  
17 JAI; 2015, p. 1–52. <https://doi.org/10.1016/bs.acdb.2014.11.001>.
- 18 [13] Deoni SCL, Dean DC, Remer J, Dirks H, O’Muircheartaigh J. Cortical  
19 maturation and myelination in healthy toddlers and young children.  
20 *Neuroimage* 2015;115:147–61.  
21 <https://doi.org/10.1016/j.neuroimage.2015.04.058>.

- 1 [14] Croteau-Chonka EC, Dean DC, Remer J, Dirks H, O’Muircheartaigh J, Deoni  
2 SCL. Examining the relationships between cortical maturation and white  
3 matter myelination throughout early childhood. *Neuroimage* 2016;125:413–21.  
4 <https://doi.org/10.1016/j.neuroimage.2015.10.038>.
- 5 [15] Rescorla L. The Language Development Survey. *J Speech Hear Disord*  
6 1989;54:587–99. <https://doi.org/10.1044/jshd.5404.587>.
- 7 [16] Rescorla L, Alley A. Validation of the Language Development Survey (LDS). *J*  
8 *Speech, Lang Hear Res* 2001;44:434–45. [https://doi.org/10.1044/1092-](https://doi.org/10.1044/1092-4388(2001/035))  
9 [4388\(2001/035\)](https://doi.org/10.1044/1092-4388(2001/035)).
- 10 [17] Manjón J V., Coupé P. volBrain: An Online MRI Brain Volumetry System.  
11 *Front Neuroinform* 2016;10. <https://doi.org/10.3389/fninf.2016.00030>.
- 12 [18] Tustison NJ, Cook PA, Klein A, Song G, Das SR, Duda JT, et al. Large-scale  
13 evaluation of ANTs and FreeSurfer cortical thickness measurements.  
14 *Neuroimage* 2014;99:166–79. <https://doi.org/10.1016/j.neuroimage.2014.05.044>.
- 15 [19] Dale AM, Fischl B, Sereno MI. Cortical surface-based analysis. I. Segmentation  
16 and surface reconstruction. *Neuroimage* 1999;9:179–94.  
17 <https://doi.org/10.1006/nimg.1998.0395>.
- 18 [20] Avants BB, Tustison NJ, Wu J, Cook PA, Gee JC. An Open Source  
19 Multivariate Framework for n-Tissue Segmentation with Evaluation on Public  
20 Data. *Neuroinformatics* 2011;9:381–400. [https://doi.org/10.1007/s12021-011-](https://doi.org/10.1007/s12021-011-9109-y)  
21 [9109-y](https://doi.org/10.1007/s12021-011-9109-y).

- 1 [21] Love SA, Marie D, Roth M, Lacoste R, Nazarian B, Bertello A, et al. The  
2 average baboon brain: MRI templates and tissue probability maps from 89  
3 individuals. *Neuroimage* 2016;132:526–33.  
4 <https://doi.org/10.1016/j.neuroimage.2016.03.018>.
- 5 [22] Avants BB, Duda JT, Kilroy E, Krasileva K, Jann K, Kandel BT, et al. The  
6 pediatric template of brain perfusion. *Sci Data* 2015;2:150003.  
7 <https://doi.org/10.1038/sdata.2015.3>.
- 8 [23] Wang H, Das SR, Suh JW, Altinay M, Pluta J, Craige C, et al. A learning-  
9 based wrapper method to correct systematic errors in automatic image  
10 segmentation: Consistently improved performance in hippocampus, cortex and  
11 brain segmentation. *Neuroimage* 2011;55:968–85.  
12 <https://doi.org/10.1016/j.neuroimage.2011.01.006>.
- 13 [24] WHO Multicentre Growth Reference Study Group. WHO child growth  
14 standards : length/height-for-age, weight-for-age, weight-for-length, weight-  
15 forheight and body mass index-for-age : methods and development. 2006.  
16 <https://doi.org/10.4067/S0370-41062009000400012>.
- 17 [25] Chipman H, Tibshirani R. Hybrid hierarchical clustering with applications to  
18 microarray data. *Biostatistics* 2006.  
19 <https://doi.org/10.1093/biostatistics/kxj007>.

- 1 [26] Weihs C, Ligges U, Luebke K, Raabe N. *klAR Analyzing German Business*  
2 *Cycles*. *Data Anal. Decis. Support*, 2005. [https://doi.org/10.1007/3-540-28397-](https://doi.org/10.1007/3-540-28397-8_36)  
3 [8\\_36](https://doi.org/10.1007/3-540-28397-8_36).
- 4 [27] Franke K, Luders E, May A, Wilke M, Gaser C. Brain maturation: Predicting  
5 individual BrainAGE in children and adolescents using structural MRI.  
6 *Neuroimage* 2012;63:1305–12.  
7 <https://doi.org/10.1016/j.neuroimage.2012.08.001>.
- 8 [28] Dosenbach NUFF, Nardos B, Cohen AL, Fair DA, Power JD, Church JA, et  
9 al. Prediction of Individual Brain Maturity Using fMRI. *Science* (80- )  
10 2010;329:1358–61. <https://doi.org/10.1126/science.1194144>.
- 11 [29] Thompson PM, Vidal C, Giedd JN, Gochman P, Blumenthal J, Nicolson R, et  
12 al. Mapping adolescent brain change reveals dynamic wave of accelerated gray  
13 matter loss in very early-onset schizophrenia. *Proc Natl Acad Sci*  
14 2001;98:11650–5. <https://doi.org/10.1073/pnas.201243998>.
- 15 [30] Bezgin G, Lewis JD, Evans AC. Developmental changes of cortical white-gray  
16 contrast as predictors of autism diagnosis and severity. *Transl Psychiatry*  
17 2018;8:249. <https://doi.org/10.1038/s41398-018-0296-2>.
- 18 [31] Hua X, Thompson PM, Leow AD, Madsen SK, Caplan R, Alger JR, et al.  
19 Brain growth rate abnormalities visualized in adolescents with autism. *Hum*  
20 *Brain Mapp* 2013;34:425–36. <https://doi.org/10.1002/hbm.21441>.

- 1 [32] Munson J, Dawson G, Abbott R, Faja S, Webb SJ, Friedman SD, et al.  
2 Amygdalar volume and behavioral development in autism. Arch Gen  
3 Psychiatry 2006;63:686. <https://doi.org/10.1001/archpsyc.63.6.686>.
- 4 [33] Kozhemiako N, Vakorin V, Nunes AS, Iarocci G, Ribary U, Doesburg SM.  
5 Extreme male developmental trajectories of homotopic brain connectivity in  
6 autism. Hum Brain Mapp 2019;40:987–1000.  
7 <https://doi.org/10.1002/hbm.24427>.
- 8 [34] Rosch KS, Crocetti D, Hirabayashi K, Denckla MB, Mostofsky SH, Mahone  
9 EM. Reduced subcortical volumes among preschool-age girls and boys with  
10 ADHD. Psychiatry Res Neuroimaging 2018;271:67–74.  
11 <https://doi.org/10.1016/j.psychres.2017.10.013>.
- 12 [35] Shaw P, Eckstrand K, Sharp W, Blumenthal J, Lerch JP, Greenstein D, et al.  
13 Attention-deficit/hyperactivity disorder is characterized by a delay in cortical  
14 maturation. Proc Natl Acad Sci 2007;104:19649–54.  
15 <https://doi.org/10.1073/pnas.0707741104>.
- 16 [36] Shaw P, Lalonde F, Lepage C, Rabin C, Eckstrand K, Sharp W, et al.  
17 Development of cortical asymmetry in typically developing children and its  
18 disruption in attention-deficit/hyperactivity disorder. Arch Gen Psychiatry  
19 2009;66:888. <https://doi.org/10.1001/archgenpsychiatry.2009.103>.
- 20 [37] Bray S, Hirt M, Jo B, Hall SS, Lightbody AA, Walter E, et al. Aberrant  
21 frontal lobe maturation in adolescents with fragile x syndrome is related to

1 delayed cognitive maturation. *Biol Psychiatry* 2011;70:852–8.

2 <https://doi.org/10.1016/j.biopsych.2011.05.038>.

3 [38] Hoefft F, Carter JC, Lightbody AA, Cody Hazlett H, Piven J, Reiss AL, et al.

4 Region-specific alterations in brain development in one- to three-year-old boys

5 with fragile X syndrome. *Proc Natl Acad Sci* 2010;107:9335–9.

6 <https://doi.org/10.1073/pnas.1002762107>.

7 [39] Deoni SCLL, O’Muircheartaigh J, Ellison JT, Walker L, Doernberg E,

8 Waskiewicz N, et al. White matter maturation profiles through early childhood

9 predict general cognitive ability. *Brain Struct Funct* 2016;221:1189–203.

10 <https://doi.org/10.1007/s00429-014-0947-x>.

11



## Tables

**Table 1. Age-dependence of brain tissue volumes.**

| Age group | Statistic                | Brain volume, excluding ventricles | Total gray matter volume | Total cortex volume | Total cerebral white matter volume | Subcortical gray matter volume | Cerebellar white matter volume | Cerebellar cortex volume |
|-----------|--------------------------|------------------------------------|--------------------------|---------------------|------------------------------------|--------------------------------|--------------------------------|--------------------------|
| Age 1     | Mean <sup>a</sup>        | 889295                             | 622038                   | 490937              | 252293                             | 42312                          | 15083                          | 88263                    |
| (n=52)    | SD <sup>a</sup>          | 88147                              | 55067                    | 47253               | 35044                              | 4767                           | 1964                           | 8416                     |
| Age 2     | Mean <sup>a</sup>        | 988666                             | 676463                   | 537235              | 296535                             | 46349                          | 16562                          | 92505                    |
| (n=49)    | SD <sup>a</sup>          | 90918                              | 55067                    | 53551               | 35373                              | 5324                           | 1608                           | 8511                     |
|           | Change rate <sup>b</sup> | 1.11                               | 1.09                     | 1.09                | 1.18                               | 1.10                           | 1.10                           | 1.05                     |
|           | t-val <sup>c</sup>       | 5.57***                            | 4.81***                  | 4.60***             | 6.31***                            | 4.01***                        | 4.15***                        | 2.52***                  |
| Age 3     | Mean <sup>a</sup>        | 1062960                            | 717391                   | 569222              | 333413                             | 49127                          | 18661                          | 98724                    |
| (n=47)    | SD <sup>a</sup>          | 91081                              | 49161                    | 44426               | 32578                              | 4709                           | 1873                           | 8918                     |
|           | Change rate <sup>b</sup> | 1.20                               | 1.15                     | 1.16                | 1.32                               | 1.16                           | 1.24                           | 1.12                     |
|           | t-val <sup>c</sup>       | 4.00***                            | 3.72***                  | 3.19**              | 5.32***                            | 2.71***                        | 5.88***                        | 3.49***                  |
| Age 4     | Mean <sup>a</sup>        | 1118411                            | 743821                   | 594120              | 357214                             | 50712                          | 19392                          | 98353                    |
| (n=34)    | SD <sup>a</sup>          | 76620                              | 48617                    | 42549               | 31941                              | 5417                           | 3101                           | 11882                    |
|           | Change rate <sup>b</sup> | 1.20                               | 1.20                     | 1.21                | 1.42                               | 1.20                           | 1.29                           | 1.11                     |
|           | t-val <sup>c</sup>       | 2.97***                            | 2.40***                  | 2.55***             | 3.28***                            | 1.37                           | 1.22                           | -0.15                    |
| Age 5     | Mean <sup>a</sup>        | 1137510                            | 744780                   | 592735              | 374540                             | 52402                          | 20429                          | 99404                    |
| (n=43)    | SD <sup>a</sup>          | 96335                              | 58417                    | 52802               | 41460                              | 4539                           | 2442                           | 11079                    |
|           | Change rate <sup>b</sup> | 1.28                               | 1.20                     | 1.21                | 1.48                               | 1.24                           | 1.35                           | 1.13                     |
|           | t-val <sup>c</sup>       | 0.97                               | 0.08                     | -0.13               | 2.07*                              | 1.46                           | 1.60                           | 0.40                     |
| Age 6     | Mean <sup>a</sup>        | 1125584                            | 726905                   | 575012              | 379174                             | 52698                          | 21693                          | 98936                    |
| (n=40)    | SD <sup>a</sup>          | 109161                             | 69385                    | 61544               | 45763                              | 4084                           | 2883                           | 11250                    |
|           | Change rate <sup>b</sup> | 1.27                               | 1.17                     | 1.17                | 1.50                               | 1.25                           | 1.44                           | 1.12                     |
|           | t-val <sup>c</sup>       | -0.53                              | -1.26                    | -1.40               | 0.48                               | 0.31                           | 2.15*                          | -0.19                    |

Note:

a. volume unit: mL;

b. change rate relative to age 1;

c. t values relative to the previous age-group; \*\*\* false discovery rate  $q < 0.05$ ; \*\*  $p < 0.01$ ; \*  $p < 0.05$ .

**Table 2. The volume of subcortical regions between 1 and 6 years old.**

|                         |   | Age 1 |      | Age 2 |      | Age 3 |      | Age 4 |      | Age 5 |      | Age 6 |      |
|-------------------------|---|-------|------|-------|------|-------|------|-------|------|-------|------|-------|------|
|                         |   | Mean  | SD   | Mean  | SD   | Mean  | SD   | Mean  | SD   | Mean  | SD   | Mean  | SD   |
| Cerebellum white matter | L | 7362  | 878  | 8055  | 839  | 9079  | 938  | 9393  | 1618 | 9927  | 1131 | 10511 | 1417 |
|                         | R | 7721  | 1129 | 8507  | 879  | 9582  | 976  | 9999  | 1586 | 10460 | 1263 | 11032 | 1281 |
| Cerebellum cortex       | L | 43842 | 4160 | 46010 | 4301 | 49157 | 4308 | 48688 | 5143 | 49159 | 5346 | 48935 | 5705 |
|                         | R | 44422 | 4316 | 46494 | 4292 | 49460 | 4425 | 49768 | 4902 | 50132 | 5588 | 50000 | 5634 |
| Thalamus                | L | 5720  | 723  | 6108  | 924  | 6371  | 711  | 6561  | 763  | 6548  | 672  | 6590  | 538  |
|                         | R | 5895  | 788  | 6292  | 1002 | 6588  | 748  | 6550  | 668  | 6816  | 739  | 6824  | 701  |
| Thalamus (Male)         | L | 6215  | 808  | 6470  | 919  | 6640  | 692  | 6744  | 495  | 7010  | 709  | 6905  | 716  |
|                         | R | 5976  | 753  | 6322  | 879  | 6404  | 644  | 6785  | 590  | 6750  | 682  | 6727  | 553  |
| Thalamus (Female)       | L | 5459  | 512  | 6033  | 1082 | 6510  | 836  | 6305  | 787  | 6547  | 713  | 6770  | 700  |
|                         | R | 5370  | 516  | 5798  | 920  | 6323  | 815  | 6277  | 878  | 6267  | 561  | 6499  | 520  |
| Caudate                 | L | 3041  | 445  | 3180  | 466  | 3375  | 491  | 3479  | 533  | 3594  | 411  | 3616  | 487  |
|                         | R | 2828  | 501  | 2795  | 595  | 2932  | 602  | 3106  | 657  | 3226  | 552  | 3272  | 548  |
| Putamen                 | L | 3953  | 554  | 4374  | 774  | 4613  | 746  | 5021  | 963  | 5344  | 618  | 5256  | 642  |
|                         | R | 3904  | 720  | 4420  | 821  | 4634  | 763  | 4804  | 1087 | 5307  | 721  | 5239  | 709  |
| Pallidum                | L | 1194  | 379  | 1241  | 417  | 1341  | 349  | 1542  | 400  | 1624  | 261  | 1642  | 280  |
|                         | R | 1145  | 429  | 1134  | 470  | 1325  | 418  | 1393  | 459  | 1599  | 290  | 1622  | 303  |
| Hippocampus             | L | 2686  | 312  | 2885  | 326  | 3149  | 322  | 3254  | 399  | 3427  | 312  | 3466  | 328  |
|                         | R | 2594  | 268  | 2795  | 380  | 3008  | 273  | 3116  | 373  | 3308  | 263  | 3337  | 317  |
| Amygdala                | L | 1036  | 194  | 1122  | 191  | 1193  | 217  | 1228  | 206  | 1251  | 222  | 1232  | 184  |
|                         | R | 855   | 225  | 886   | 214  | 1005  | 192  | 1023  | 192  | 1123  | 179  | 1126  | 179  |
| Accumbens area          | L | 484   | 109  | 630   | 183  | 631   | 174  | 697   | 168  | 651   | 120  | 653   | 171  |
|                         | R | 577   | 208  | 780   | 266  | 836   | 268  | 855   | 244  | 776   | 192  | 774   | 221  |
| Ventral DC              | L | 2715  | 420  | 3245  | 536  | 3410  | 561  | 3393  | 474  | 3268  | 490  | 3373  | 518  |
|                         | R | 2659  | 399  | 3065  | 459  | 3293  | 505  | 3283  | 403  | 3199  | 440  | 3330  | 469  |

Note: The unit of volume is mL.

## Figures

Figure 1

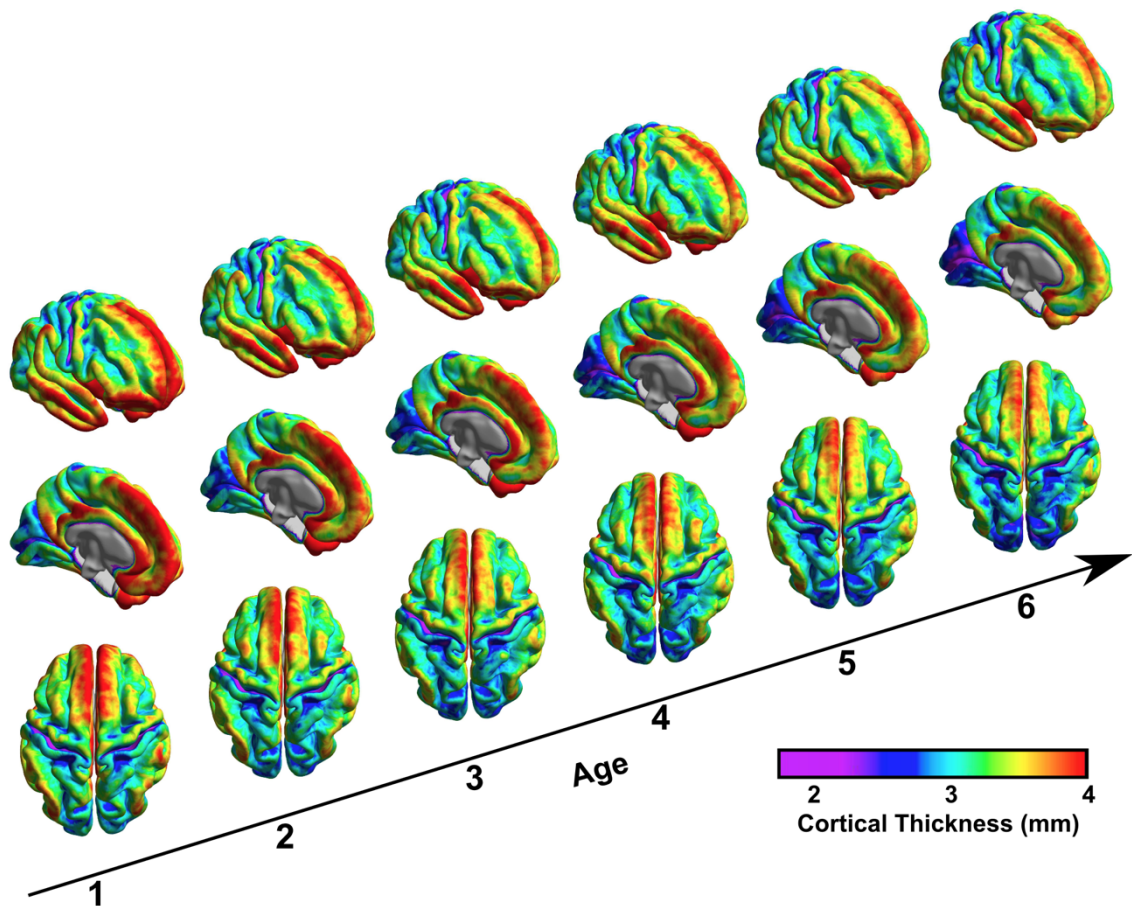

Figure 1. Dynamic maps of cortical thickness. The colors indicate cortical thickness. Most cortical regions become thinner from 1 to 6 years old. The medial frontal cortex, anterior cingulate cortex, and the parietal cortex exhibit fast changes during this period.

Figure 2

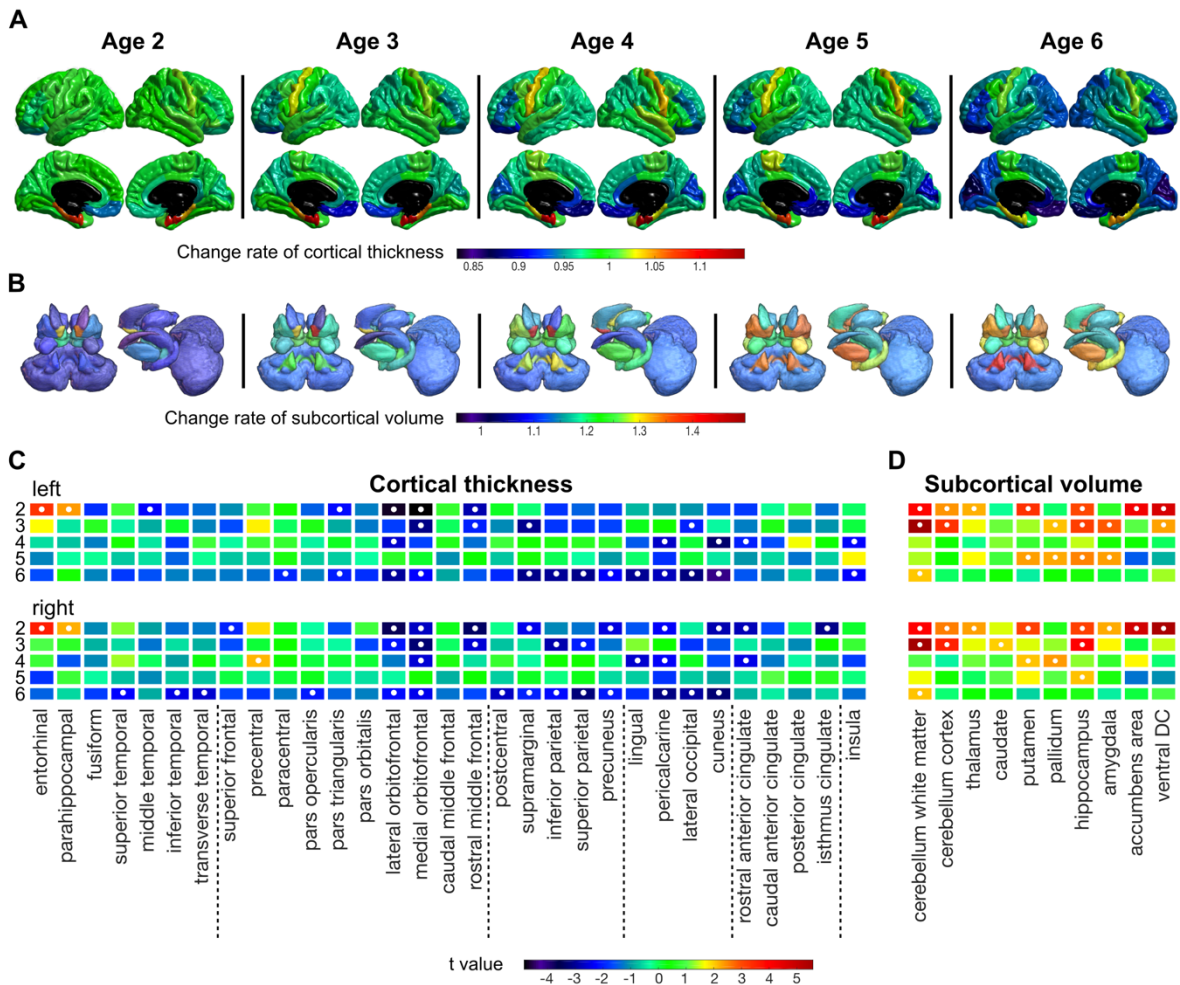

Figure 2. Annual changes in cortical and subcortical regions. A. Change rate of cortical thickness, relative to age 1. While most regions become thinner, the cortical thickness of the precentral gyrus, entorhinal cortex, and parahippocampal gyrus increases and decreases. B. Change rate of volume of subcortical regions, relative to age 1. Most subcortical regions' volume increases with age, and some regions are 30% larger than the first year. C. Year-by-year difference of cortical thickness. The colors represent t-values comparing the current year with the year before. The white dots indicate significant differences after multiple-comparison correction using a false-discovery rate  $< 0.05$ . D. Year-by-year difference in the volume of subcortical regions. The colors represent t-values comparing the current year with the year before. The white dots indicate significant differences after multiple-comparison correction using a false-discovery rate  $< 0.05$ .

Figure 3

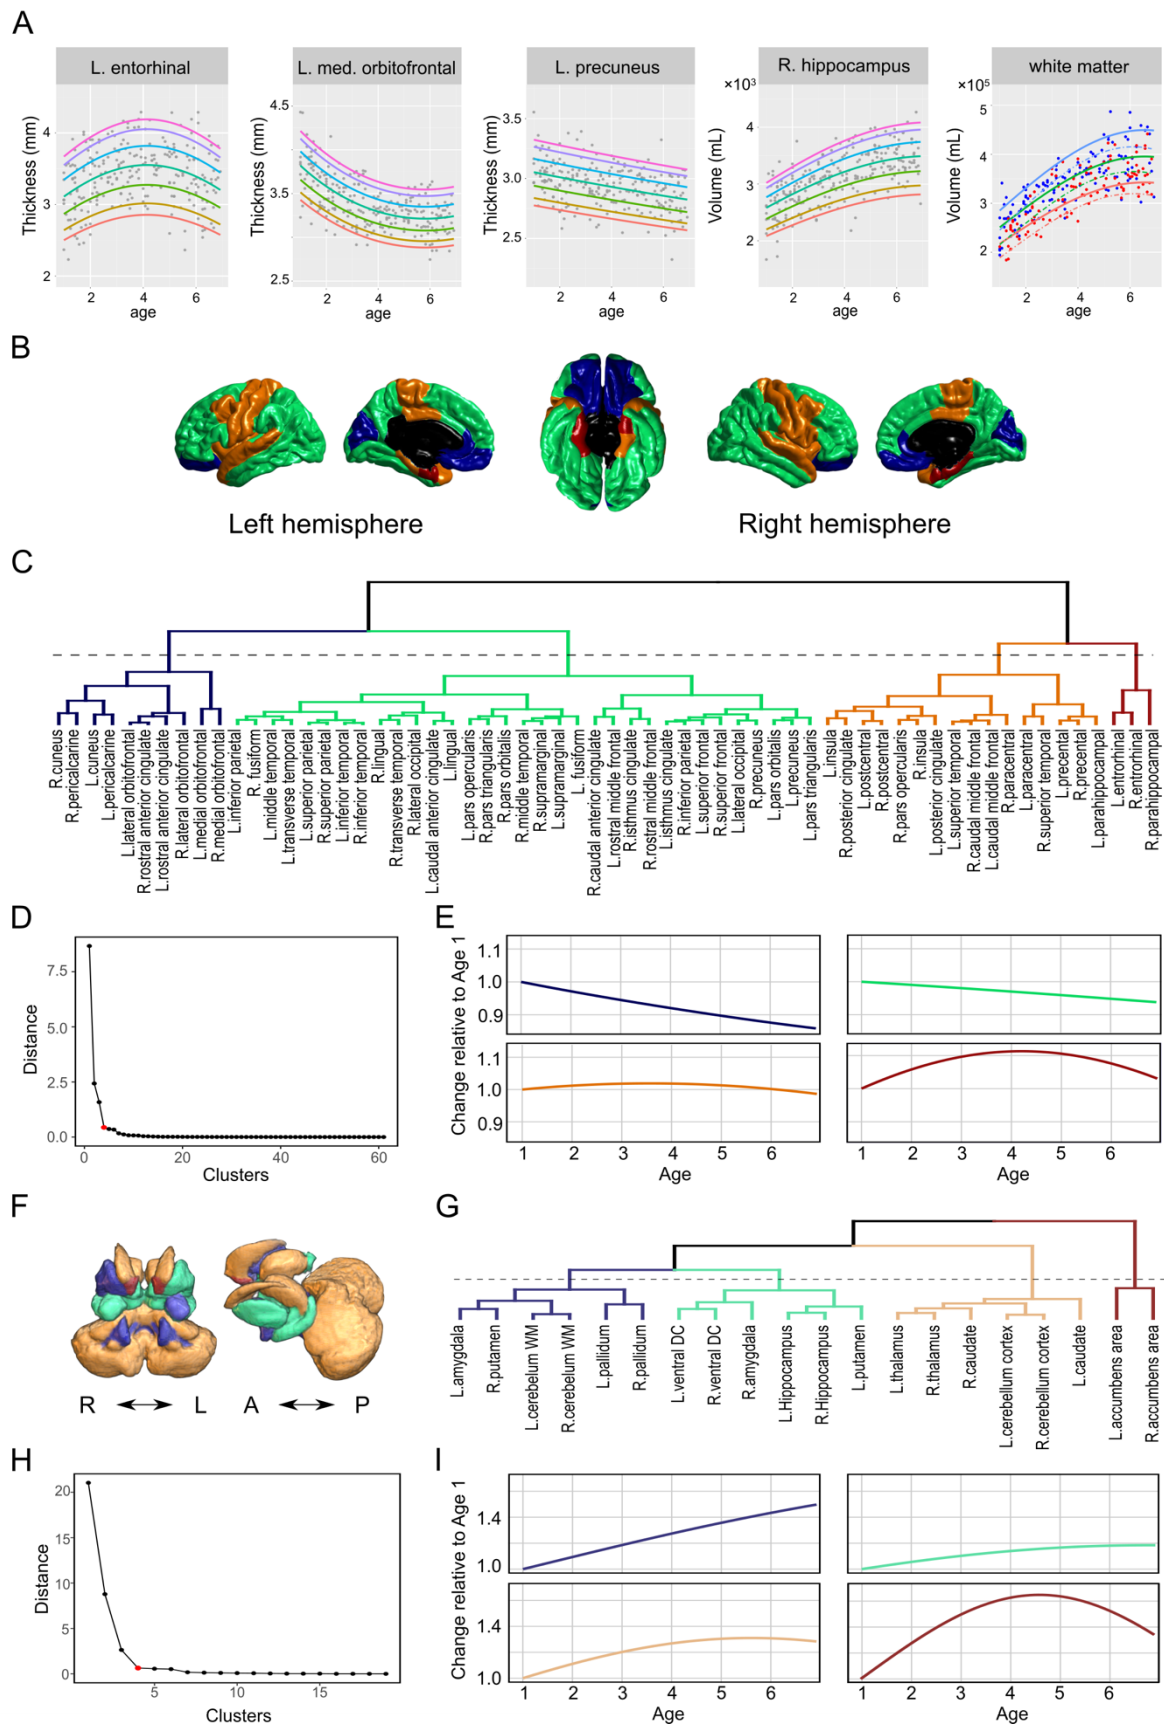

Figure 3. Regional growth curve models and clustering results of age-dependence patterns. A. Examples of regional growth curve models. The curves with different colors represent the 5<sup>th</sup>, 10<sup>th</sup>, 25<sup>th</sup>, 50<sup>th</sup>, 75<sup>th</sup>, 90<sup>th</sup>, and 95<sup>th</sup> percentiles of the growth curves. The grey dots represent the actual data for fitting the models. For metrics showing significant sex differences, such as white matter volume, sex-specific growth curves are fitted. B. Visualization of the four types of cortical regions carrying different age-dependence patterns. C. Hierarchical dendrogram of similarity of growth curves among all cortical regions. D. A knee plot of inter-cluster distance as a function of the number of clusters in the dendrogram (panel C). Starting from 4 clusters (red dot), the distance is stable. E. Change rates of the median of the growth curves corresponding to the four clusters. F. Visualization of the four types of subcortical regions carrying different age-dependence patterns. G. Hierarchical dendrogram of similarity of growth curves among all subcortical regions. H. A knee plot of inter-cluster distance as a function of the number of clusters in the dendrogram (panel G). The distance is stable, starting from 4 clusters (red dot). I. Change rates of the median of the growth curves corresponding to the four clusters.

Figure 4

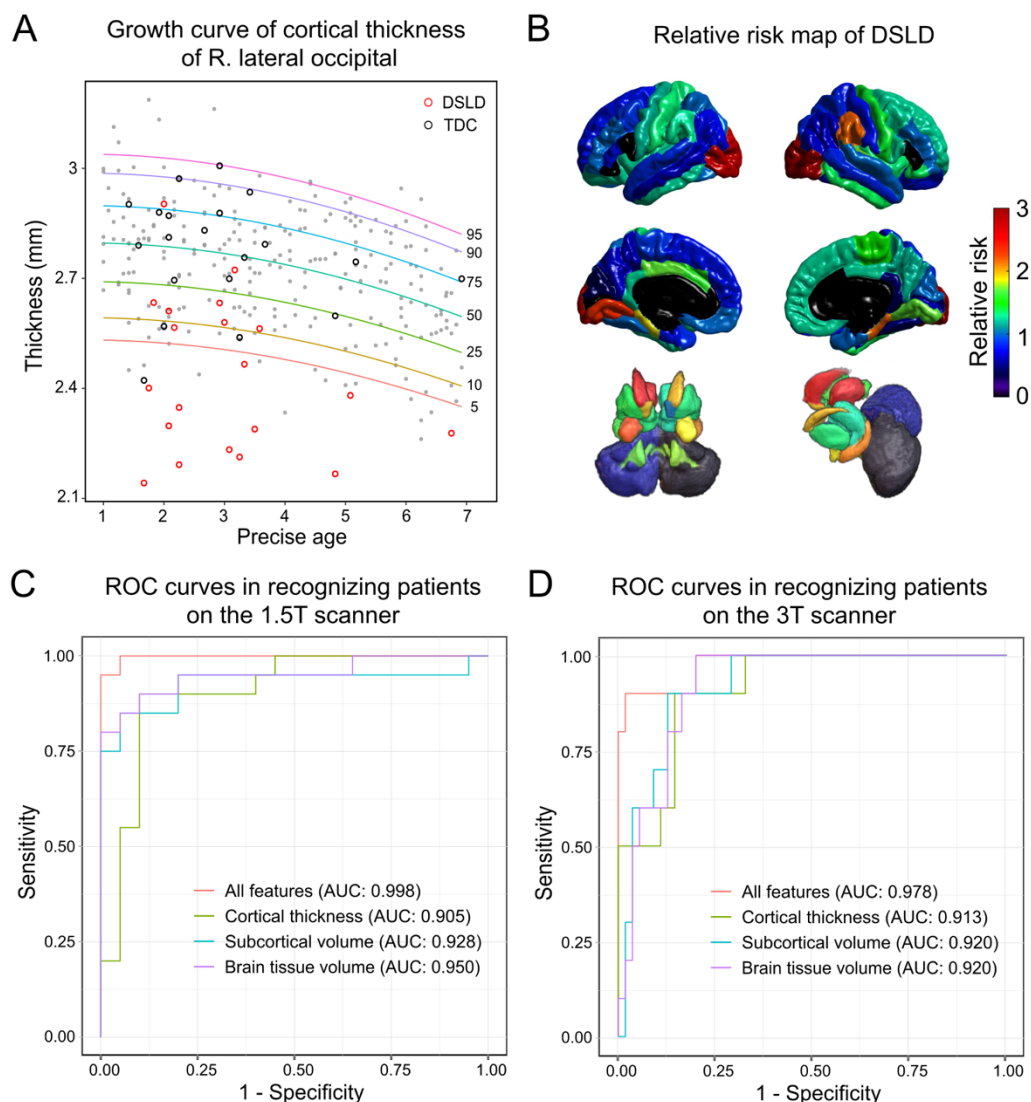

Figure 4. Multivariate classification of developmental speech and language disorder (DSL) using growth curves of brain regions. A. A growth curve model for the cortical thickness of the right lateral occipital. The growth curve model is presented using curves indicating different percentiles in the population, from 5<sup>th</sup> to 95<sup>th</sup>. The gray dots indicate data from individual participants that were used to construct the growth curve models. An independent set of 20 DSLD patients and 20 age-matched controls are presented using red and black circles, respectively. The locations of these circles indicate their position in the same-age population. B. Relative risk map of DSLD. The relative risk value for each region was calculated by dividing the proportion of DSLD among all participants showing abnormality by the proportion of DSLD among all participants not showing abnormality. The abnormality was defined as outside the 5%-95% range of the given region's growth curve model. A high relative risk value indicates

the abnormal development of a given brain region is a risk factor of DSLD. C. Receiver operation characteristic (ROC) curves of classifiers that identify DSLD patients from the typically developing children. These classifiers utilize the circles in the growth curve models (e.g., those in panel A) of brain morphometrics. The classifier that adopts the growth curve models of all morphological metrics, including regional thickness/volume metrics and brain tissue volume measures, achieves the highest area under the curve (AUC) of 0.998, with a classification accuracy of 0.975. D. ROC curves of the classifiers trained using the 1.5T data and tested using independent data from the 3T scanner. The AUC is 0.978 for the classifiers combining all the features, demonstrating the sensitivity and generalizability of the growth curves and DSLD recognition models.
